# Supplementary material for: Remote heteroepitaxy of atomic layered hafnium disulfide on sapphire through hexagonal boron nitride
Source: Royal Society of Chemistry journal article supplement (doi:10.1039/c9nr01700c), 2019-01-01
Supplement: c9nr01700c1.pdf [file c9nr01700c1.pdf]

## Electronic Supplementary Information

# **Remote heteroepitaxy of atomic layered hafnium disulfide on sapphire through hexagonal boron nitride**

Denggui Wang,<sup>a</sup> Yong Lu,<sup>b</sup> Junhua Meng,<sup>\*a</sup> Xingwang Zhang,<sup>\*a</sup> Zhigang Yin,<sup>a</sup> Menglei Gao,<sup>a</sup>  
Ye Wang,<sup>a</sup> Likun Cheng,<sup>a</sup> Jingbi You<sup>a</sup> and Jicai Zhang<sup>b</sup>

<sup>a</sup> Key Lab of Semiconductor Materials Science, Institute of Semiconductors, Chinese Academy of Sciences, Beijing 100083, & Center of Materials Science and Optoelectronics Engineering, University of Chinese Academy of Sciences, Beijing 100049, P. R. China

<sup>b</sup> College of Science, Beijing University of Chemical Technology, Beijing 100029, P. R. China

\* Corresponding author. E-mail: [jhmeng@semi.ac.cn](mailto:jhmeng@semi.ac.cn); [xwzhang@semi.ac.cn](mailto:xwzhang@semi.ac.cn)

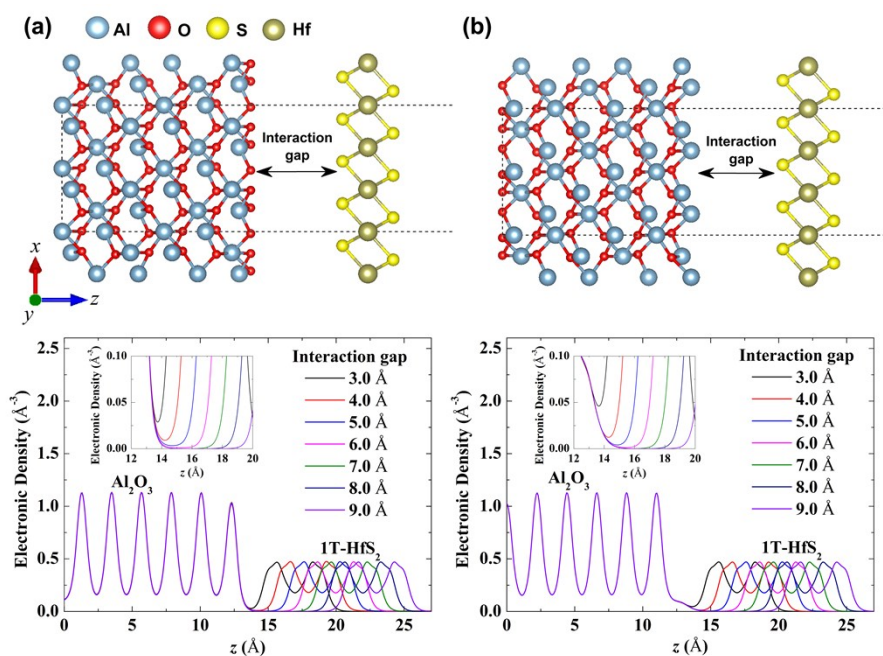

**Fig. S1** Substrate-epilayer remote interaction with different gaps created by different numbers of stacked h-BN interlayer. Results of DFT calculations of averaged electron density along separated slabs for (a) O- and (b) Al-terminated sapphire. Periodic boundary conditions were imposed along the dashed lines of simulation model. Both plots show the existence of significant electron charge density between separated slabs within a gap of about 7 Å.

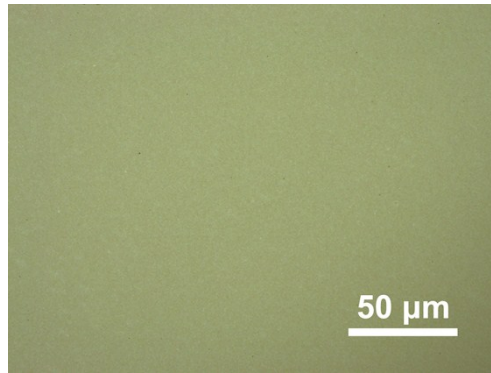

**Fig. S2** Large-area optical microscopy image of  $\text{HfS}_2/\text{h-BN}$  layer on *c*-sapphire.

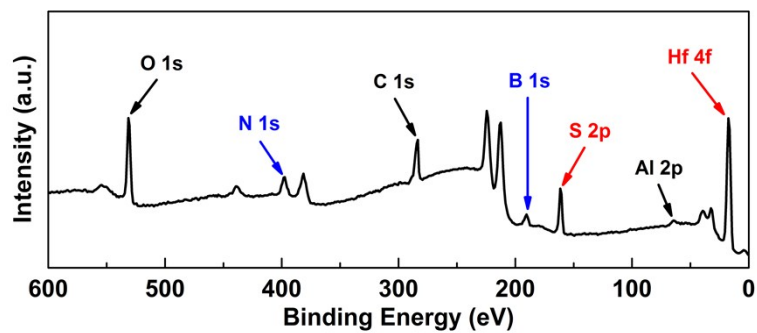

**Fig. S3** Full XPS spectrum of remote epitaxial HfS<sub>2</sub> layer on *c*-sapphire through a monolayer h-BN.

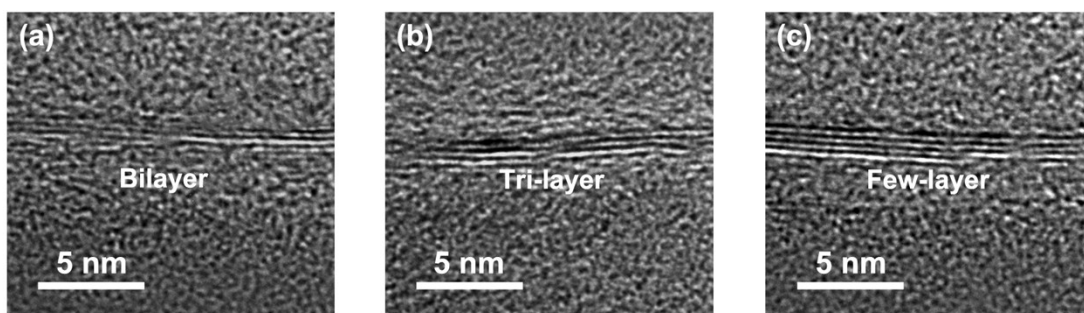

**Fig. S4** TEM measurements. Cross-sectional TEM images of as-grown h-BN layer with the growth time of (a) 10 min, (b) 15 min and (c) 20 min, labeled by bilayer, tri-layer and few-layer, respectively.

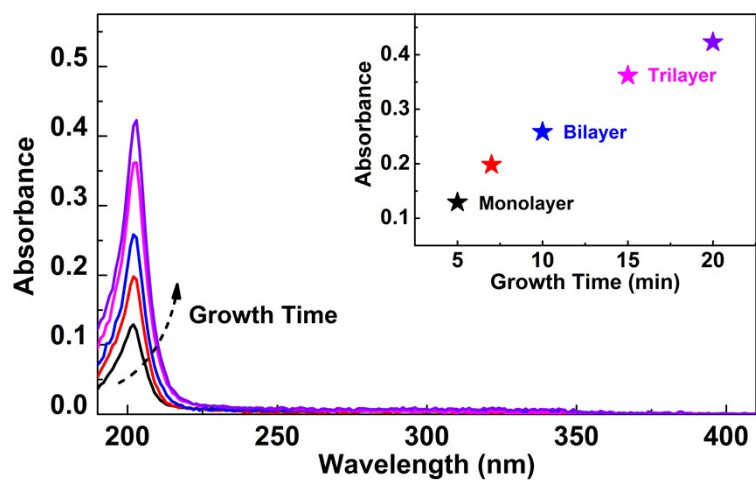

**Fig. S5** UV-vis absorption spectra of h-BN layers on sapphire with different growth time. It can be seen that the absorbance of h-BN increases with increasing growth time, which is consistent with the increased layer number of h-BN.

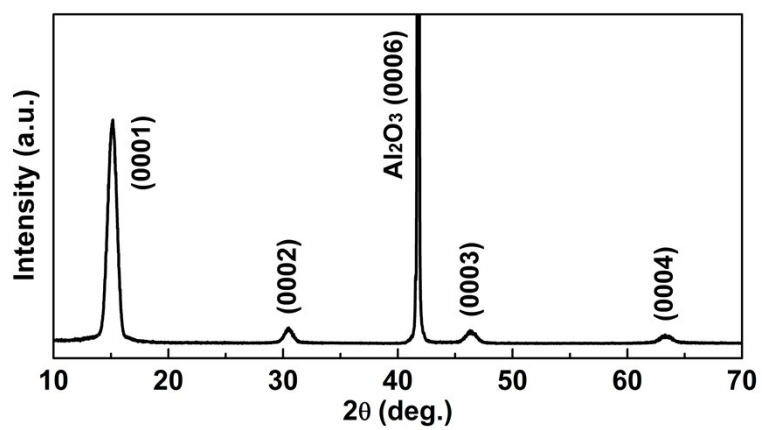

**Fig. S6** XRD pattern of remote epitaxial HfS<sub>2</sub> layer on *c*-sapphire through a monolayer h-BN.

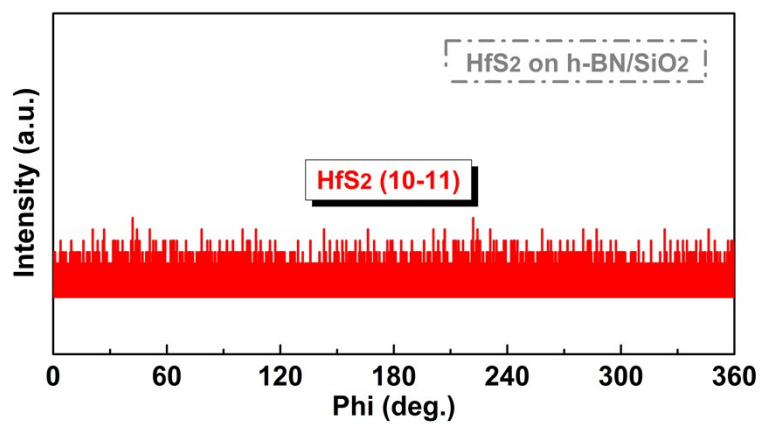

**Fig. S7** XRD azimuthal scan of HfS<sub>2</sub> (10-11) reflection. Here, the HfS<sub>2</sub> layer was grown on SiO<sub>2</sub>/Si substrate through a monolayer h-BN by CVD under the same conditions.



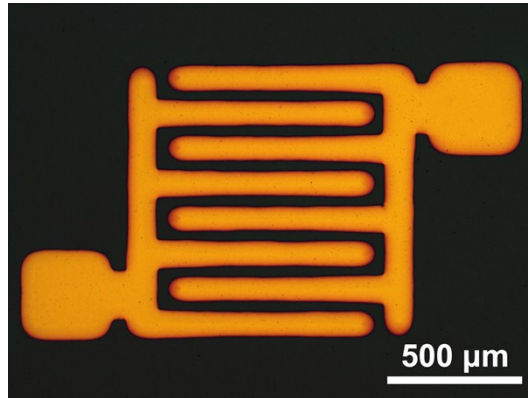

**Fig. S8** Optical microscope image of HfS<sub>2</sub>/h-BN photodetector on *c*-sapphire. The distance between two adjacent Au electrodes is determined to be ~70 μm.

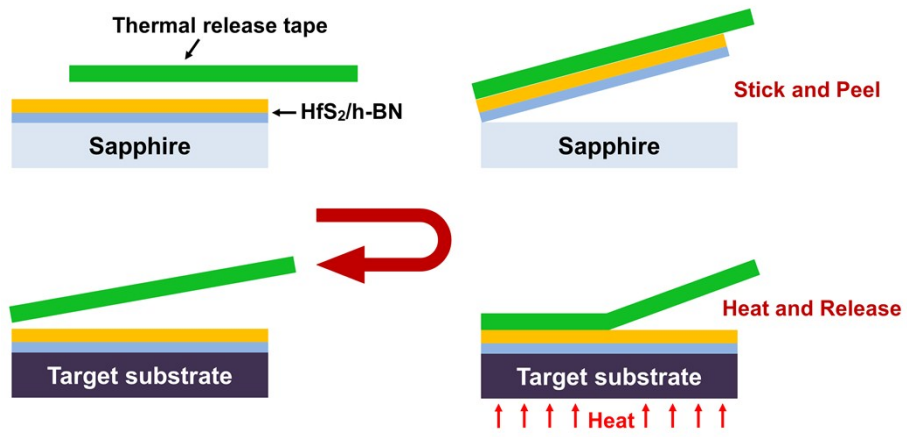

**Fig. S9** Schematic diagrams of dry-transferring HfS<sub>2</sub>/h-BN layer from sapphire substrate using a thermal release tape.

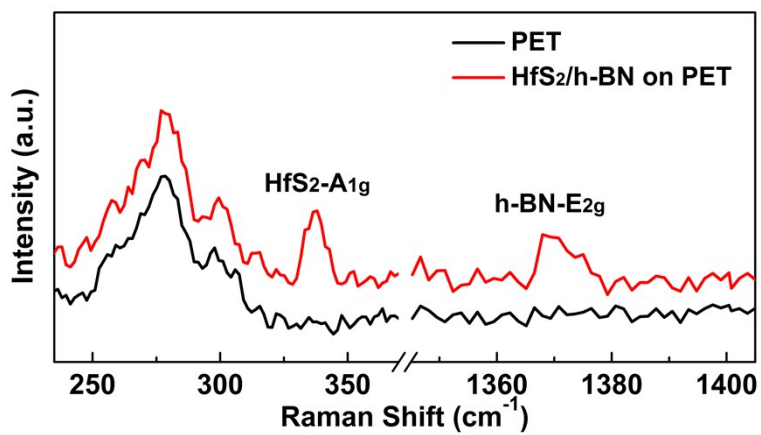

**Fig. S10** Raman spectra acquired from HfS<sub>2</sub>/h-BN heterostructure on a PET substrate. The results confirm the coexistence of h-BN and HfS<sub>2</sub> after dry-transfer.
